# Supplementary material for: Accuracy of clinical tests in the diagnosis of anterior cruciate ligament injury: a systematic review
Source: PubMed Central journal article supplement (PMC4152763; doi:10.1186/s12998-014-0025-8), 2014-08-01
Supplement: s12998-014-0025-8-S4.pdf [file s12998-014-0025-8-S4.pdf]

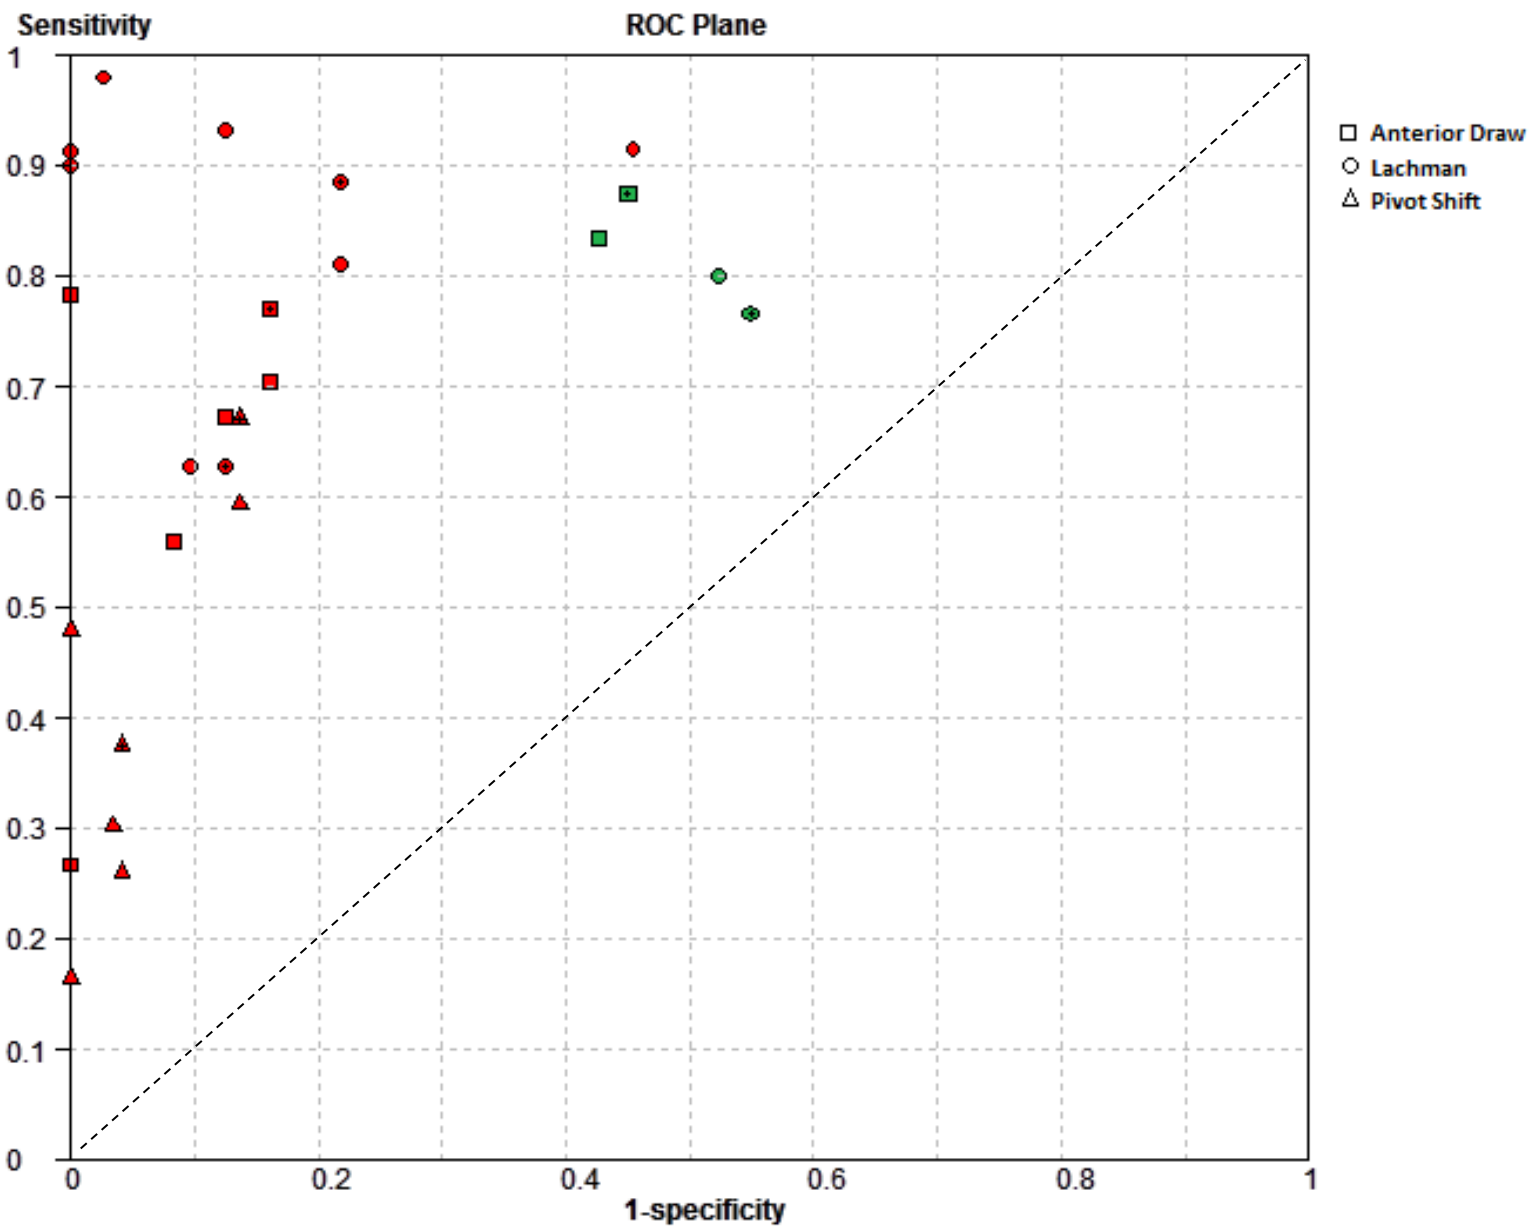

### Anterior Draw

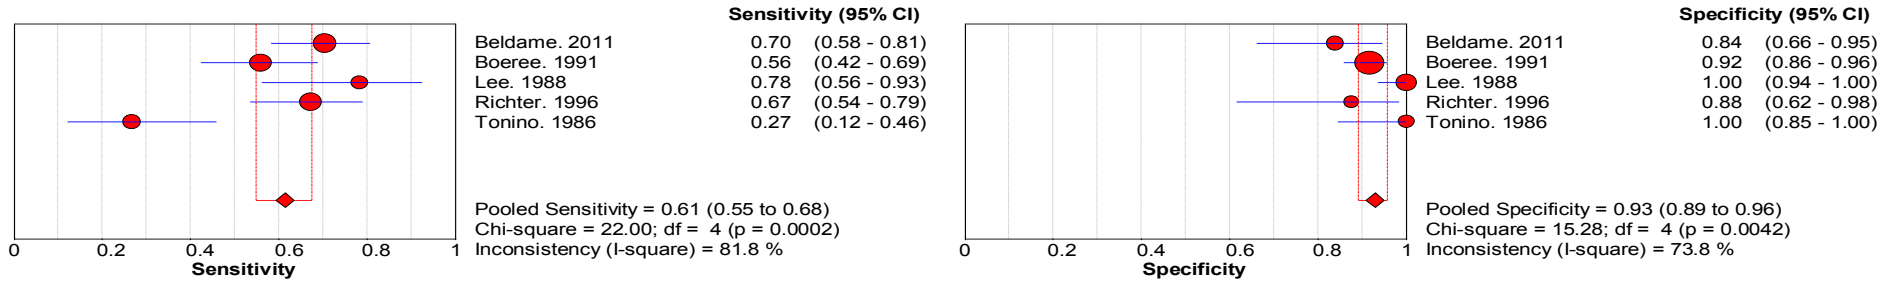

### Lachman

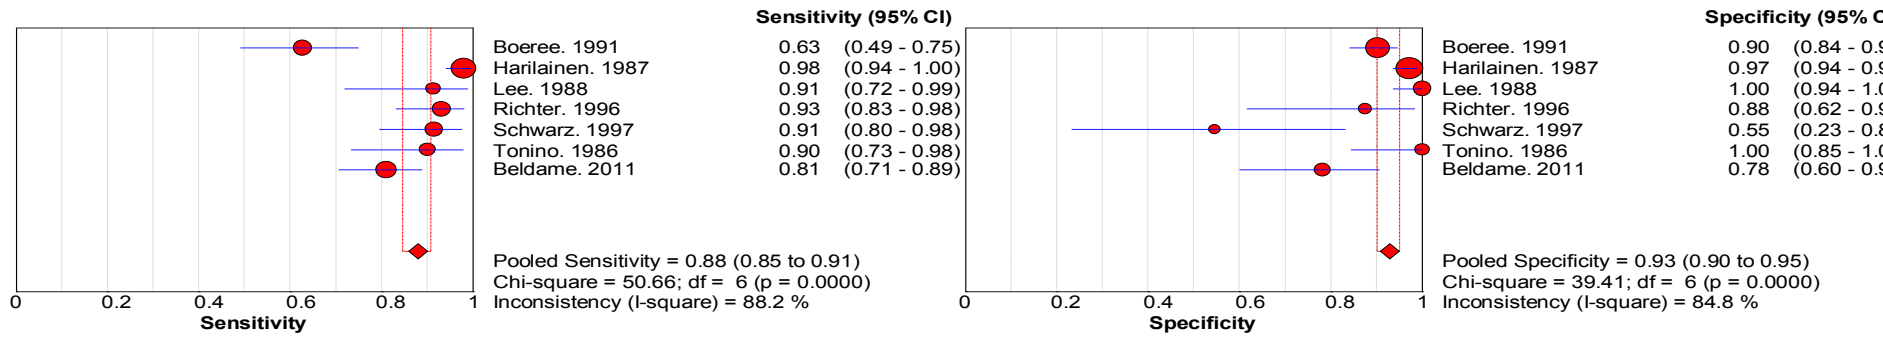

### Pivot Shift

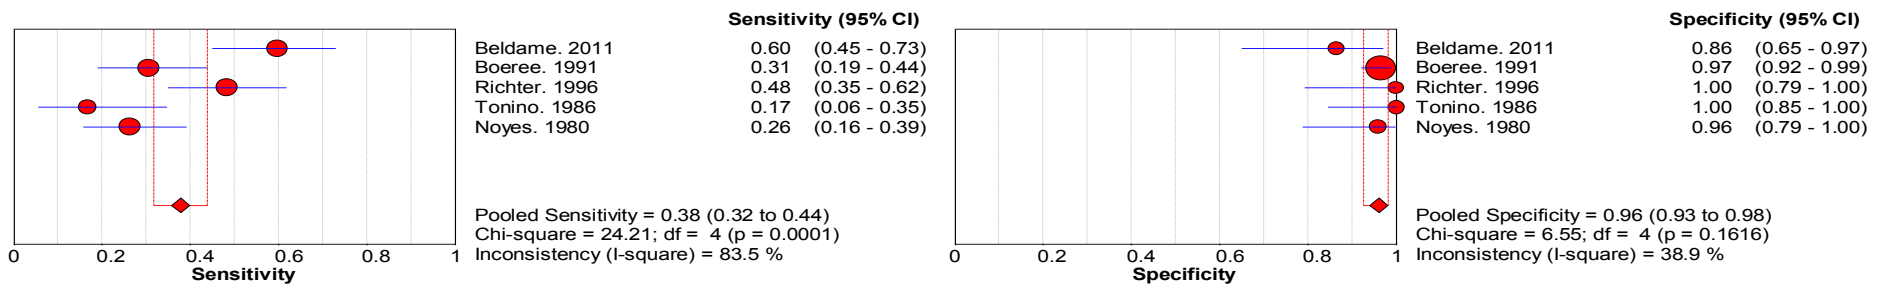

**Anterior Draw**

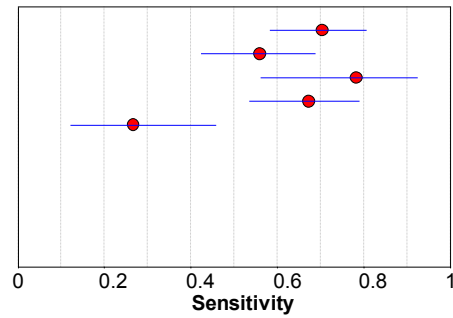

| Study         | Sensitivity (95% CI) |
|---------------|----------------------|
| Beldame. 2011 | 0.70 (0.58 - 0.81)   |
| Boeree. 1991  | 0.56 (0.42 - 0.69)   |
| Lee. 1988     | 0.78 (0.56 - 0.93)   |
| Richter. 1996 | 0.67 (0.54 - 0.79)   |
| Tonino. 1986  | 0.27 (0.12 - 0.46)   |

Pooled Sensitivity = 0.61 (0.55 to 0.68)  
 Chi-square = 22.00; df = 4 (p = 0.0002)  
 Inconsistency (I-square) = 81.8 %

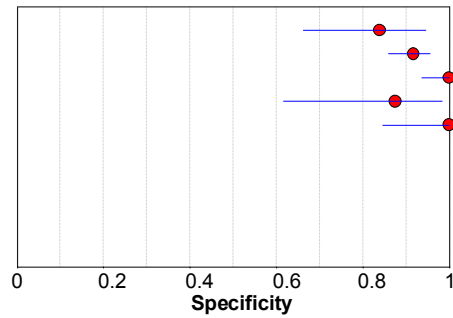

| Study         | Specificity (95% CI) |
|---------------|----------------------|
| Beldame. 2011 | 0.84 (0.66 - 0.95)   |
| Boeree. 1991  | 0.92 (0.86 - 0.96)   |
| Lee. 1988     | 1.00 (0.94 - 1.00)   |
| Richter. 1996 | 0.88 (0.62 - 0.98)   |
| Tonino. 1986  | 1.00 (0.85 - 1.00)   |

Pooled Specificity = 0.93 (0.89 to 0.96)  
 Chi-square = 15.28; df = 4 (p = 0.0042)  
 Inconsistency (I-square) = 73.8 %

**Lachman**

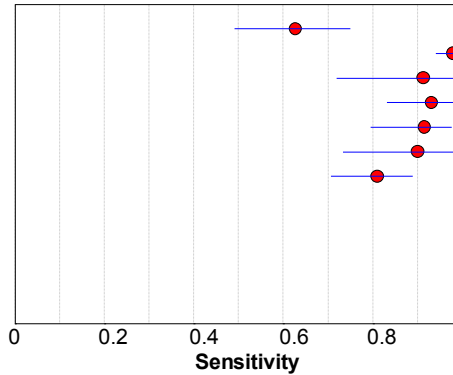

| Study            | Sensitivity (95% CI) |
|------------------|----------------------|
| Boeree. 1991     | 0.63 (0.49 - 0.75)   |
| Harilainen. 1987 | 0.98 (0.94 - 1.00)   |
| Lee. 1988        | 0.91 (0.72 - 0.99)   |
| Richter. 1996    | 0.93 (0.83 - 0.98)   |
| Schwarz. 1997    | 0.91 (0.80 - 0.98)   |
| Tonino. 1986     | 0.90 (0.73 - 0.98)   |
| Beldame. 2011    | 0.81 (0.71 - 0.89)   |

Pooled Sensitivity = 0.88 (0.85 to 0.91)  
 Chi-square = 50.66; df = 6 (p = 0.0000)  
 Inconsistency (I-square) = 88.2 %

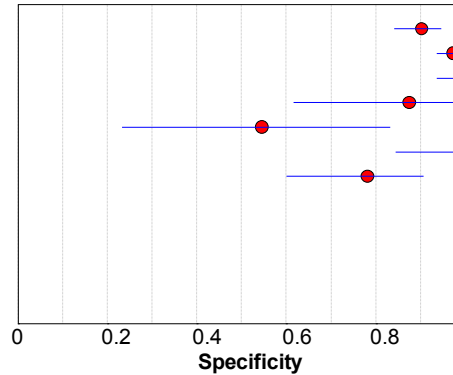

| Study            | Specificity (95% CI) |
|------------------|----------------------|
| Boeree. 1991     | 0.90 (0.84 - 0.95)   |
| Harilainen. 1987 | 0.97 (0.94 - 0.99)   |
| Lee. 1988        | 1.00 (0.94 - 1.00)   |
| Richter. 1996    | 0.88 (0.62 - 0.98)   |
| Schwarz. 1997    | 0.55 (0.23 - 0.83)   |
| Tonino. 1986     | 1.00 (0.85 - 1.00)   |
| Beldame. 2011    | 0.78 (0.60 - 0.91)   |

Pooled Specificity = 0.93 (0.90 to 0.95)  
 Chi-square = 39.41; df = 6 (p = 0.0000)  
 Inconsistency (I-square) = 84.8 %

**Pivot Shift**

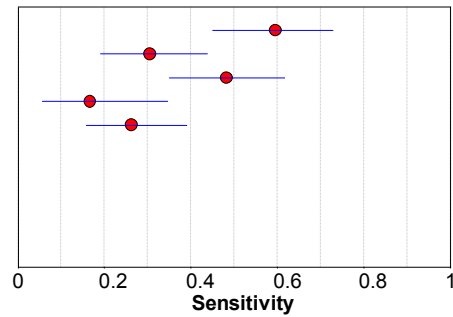

| Study         | Sensitivity (95% CI) |
|---------------|----------------------|
| Beldame. 2011 | 0.60 (0.45 - 0.73)   |
| Boeree. 1991  | 0.31 (0.19 - 0.44)   |
| Richter. 1996 | 0.48 (0.35 - 0.62)   |
| Tonino. 1986  | 0.17 (0.06 - 0.35)   |
| Noyes. 1980   | 0.26 (0.16 - 0.39)   |

Pooled Sensitivity = 0.38 (0.32 to 0.44)  
 Chi-square = 24.21; df = 4 (p = 0.0001)  
 Inconsistency (I-square) = 83.5 %

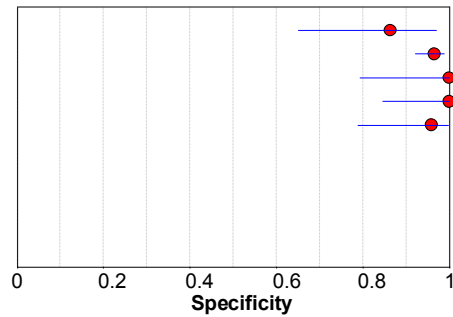

| Study         | Specificity (95% CI) |
|---------------|----------------------|
| Beldame. 2011 | 0.86 (0.65 - 0.97)   |
| Boeree. 1991  | 0.97 (0.92 - 0.99)   |
| Richter. 1996 | 1.00 (0.79 - 1.00)   |
| Tonino. 1986  | 1.00 (0.85 - 1.00)   |
| Noyes. 1980   | 0.96 (0.79 - 1.00)   |

Pooled Specificity = 0.96 (0.93 to 0.98)  
 Chi-square = 6.55; df = 4 (p = 0.1616)  
 Inconsistency (I-square) = 38.9 %

### Anterior Draw

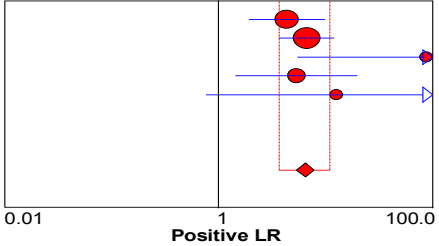

| Study         | Positive LR (95% CI)    |
|---------------|-------------------------|
| Beldame. 2011 | 4.37 (1.93 - 9.88)      |
| Boeree. 1991  | 6.71 (3.73 - 12.07)     |
| Lee. 1988     | 87.87 (5.52 - 1,399.90) |
| Richter. 1996 | 5.38 (1.45 - 19.91)     |
| Tonino. 1986  | 12.61 (0.77 - 207.56)   |

Random Effects Model  
 Pooled Positive LR = 6.40 (3.71 to 11.03)  
 Cochran-Q = 4.90; df = 4 (p = 0.2975)  
 Inconsistency (I-square) = 18.4 %  
 Tau-squared = 0.0749

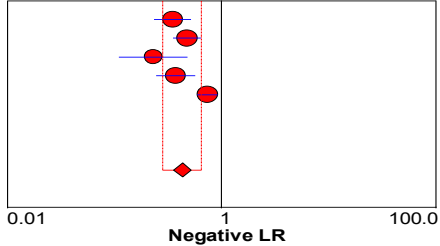

| Study         | Negative LR (95% CI) |
|---------------|----------------------|
| Beldame. 2011 | 0.35 (0.24 - 0.52)   |
| Boeree. 1991  | 0.48 (0.36 - 0.64)   |
| Lee. 1988     | 0.23 (0.11 - 0.48)   |
| Richter. 1996 | 0.37 (0.25 - 0.57)   |
| Tonino. 1986  | 0.74 (0.59 - 0.93)   |

Random Effects Model  
 Pooled Negative LR = 0.43 (0.28 to 0.65)  
 Cochran-Q = 26.34; df = 4 (p = 0.0000)  
 Inconsistency (I-square) = 84.8 %  
 Tau-squared = 0.1789

### Lachman

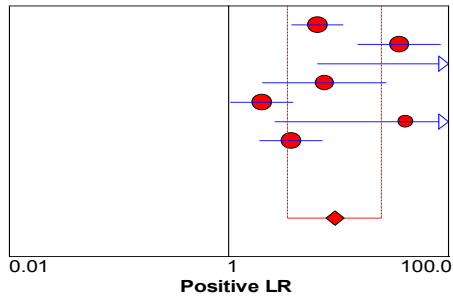

| Study            | Positive LR (95% CI)     |
|------------------|--------------------------|
| Boeree. 1991     | 6.45 (3.78 - 11.02)      |
| Harilainen. 1987 | 35.65 (15.02 - 84.65)    |
| Lee. 1988        | 102.13 (6.44 - 1,618.41) |
| Richter. 1996    | 7.45 (2.03 - 27.28)      |
| Schwarz. 1997    | 2.01 (1.05 - 3.87)       |
| Tonino. 1986     | 40.81 (2.62 - 634.75)    |
| Beldame. 2011    | 3.70 (1.91 - 7.19)       |

Random Effects Model  
 Pooled Positive LR = 9.21 (3.44 to 24.70)  
 Cochran-Q = 45.92; df = 6 (p = 0.0000)  
 Inconsistency (I-square) = 86.9 %  
 Tau-squared = 1.3200

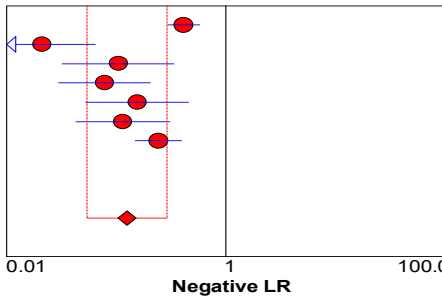

| Study            | Negative LR (95% CI) |
|------------------|----------------------|
| Boeree. 1991     | 0.41 (0.30 - 0.58)   |
| Harilainen. 1987 | 0.02 (0.01 - 0.06)   |
| Lee. 1988        | 0.11 (0.03 - 0.34)   |
| Richter. 1996    | 0.08 (0.03 - 0.21)   |
| Schwarz. 1997    | 0.16 (0.05 - 0.46)   |
| Tonino. 1986     | 0.12 (0.04 - 0.31)   |
| Beldame. 2011    | 0.24 (0.15 - 0.40)   |

Random Effects Model  
 Pooled Negative LR = 0.13 (0.05 to 0.29)  
 Cochran-Q = 54.14; df = 6 (p = 0.0000)  
 Inconsistency (I-square) = 88.9 %  
 Tau-squared = 1.0629

### Pivot Shift

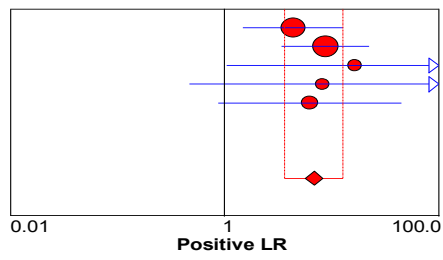

| Study         | Positive LR (95% CI)  |
|---------------|-----------------------|
| Beldame. 2011 | 4.37 (1.49 - 12.81)   |
| Boeree. 1991  | 8.79 (3.42 - 22.57)   |
| Richter. 1996 | 16.42 (1.06 - 255.24) |
| Tonino. 1986  | 8.16 (0.47 - 140.30)  |
| Noyes. 1980   | 6.30 (0.88 - 44.88)   |

Random Effects Model  
 Pooled Positive LR = 6.87 (3.65 to 12.92)  
 Cochran-Q = 1.36; df = 4 (p = 0.8510)  
 Inconsistency (I-square) = 0.0 %  
 Tau-squared = 0.0000

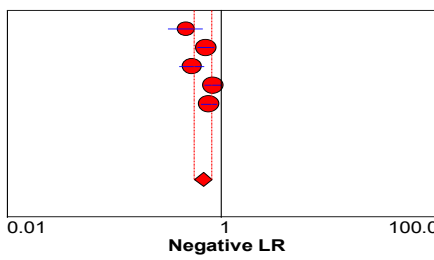

| Study         | Negative LR (95% CI) |
|---------------|----------------------|
| Beldame. 2011 | 0.47 (0.32 - 0.68)   |
| Boeree. 1991  | 0.72 (0.61 - 0.85)   |
| Richter. 1996 | 0.53 (0.41 - 0.69)   |
| Tonino. 1986  | 0.84 (0.71 - 1.00)   |
| Noyes. 1980   | 0.77 (0.65 - 0.91)   |

Random Effects Model  
 Pooled Negative LR = 0.68 (0.56 to 0.81)  
 Cochran-Q = 15.12; df = 4 (p = 0.0045)  
 Inconsistency (I-square) = 73.5 %  
 Tau-squared = 0.0311

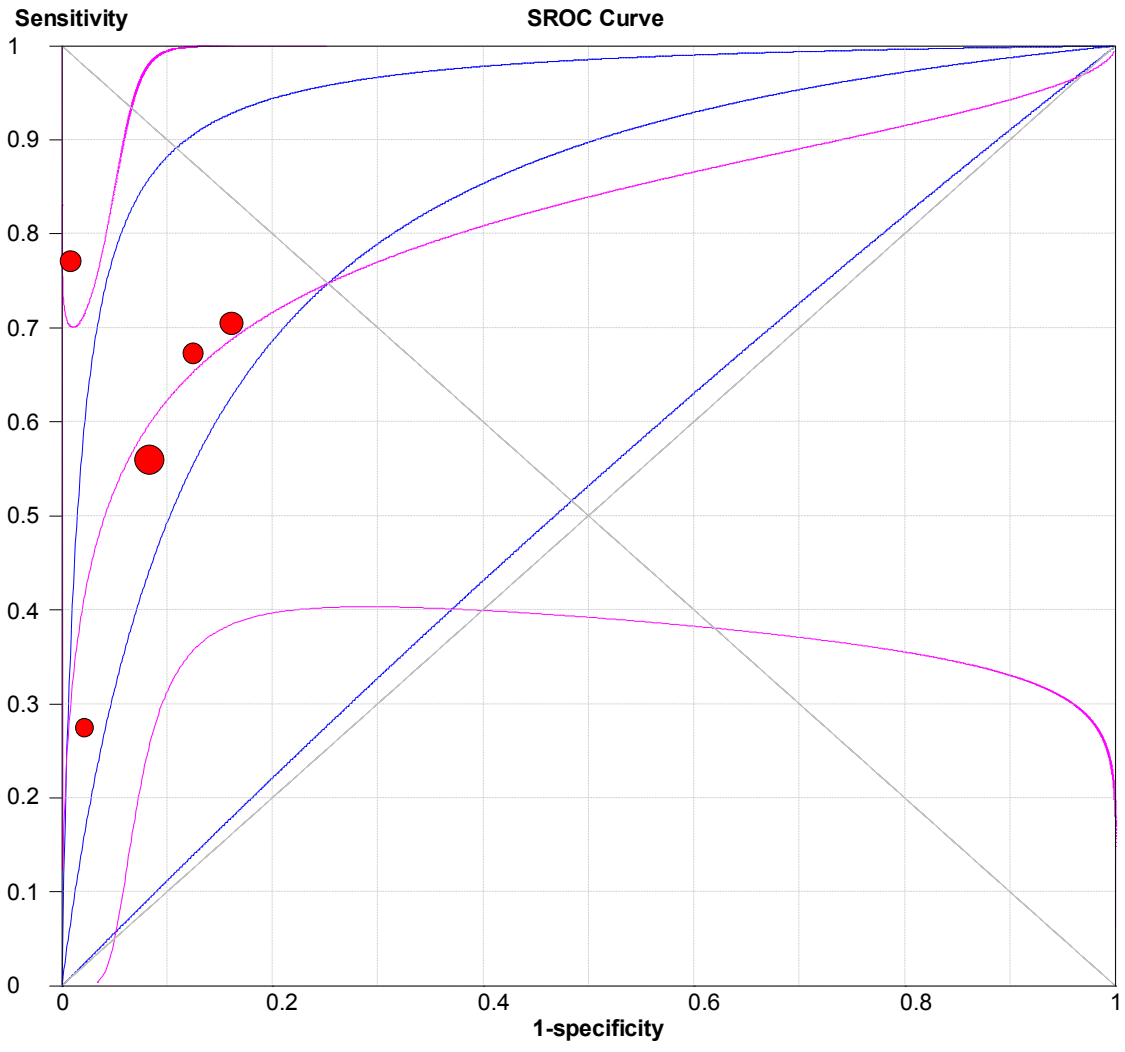

**Symmetric SROC**  
AUC = 0.8132  
SE(AUC) = 0.0680  
Q\* = 0.7475  
SE(Q\*) = 0.0605

**Asymmetric SROC**  
AUC = 0.8053  
SE(AUC) = 0.0844  
Q\* = 0.7475  
SE(Q\*) = 0.0605

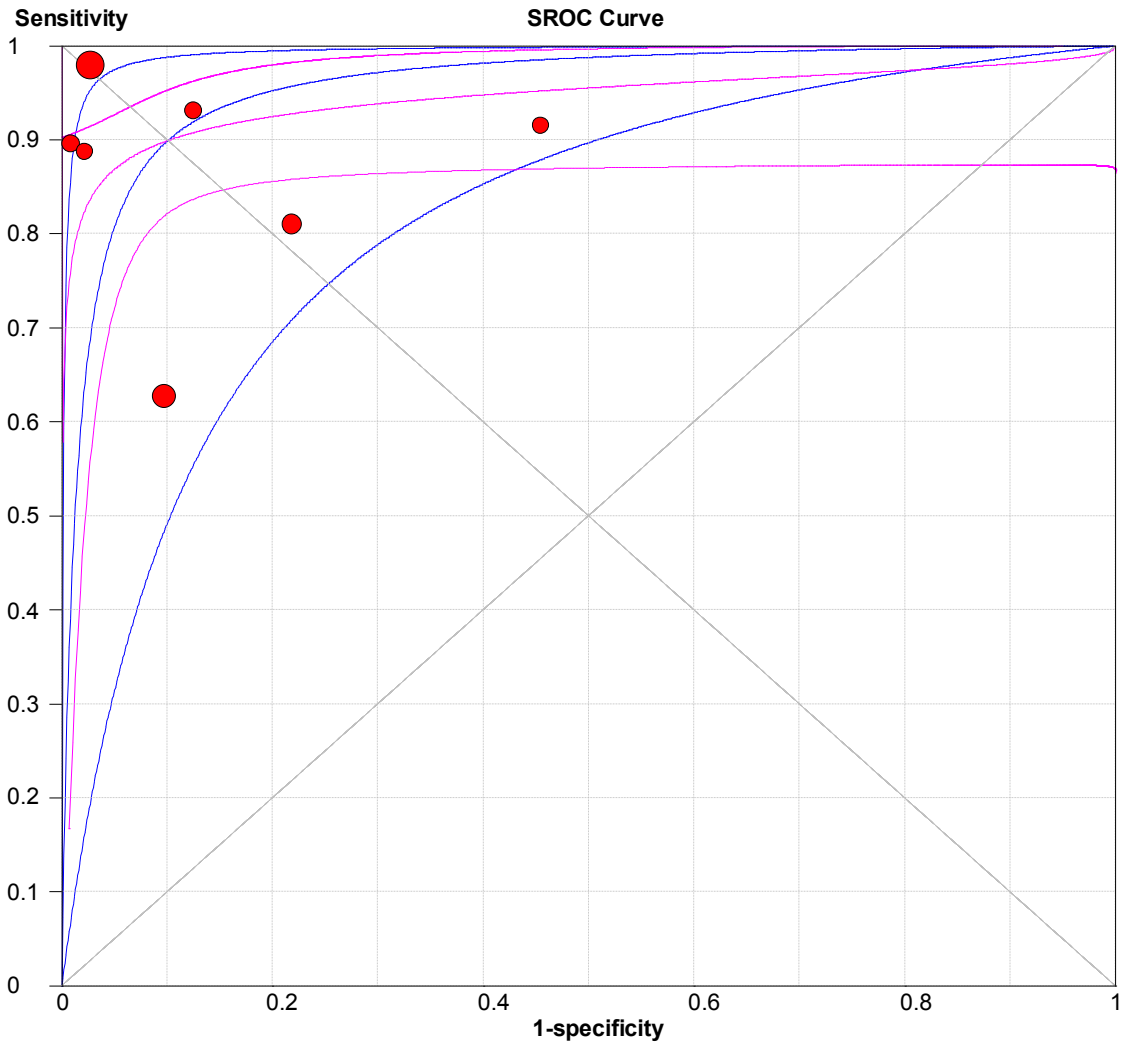

**Symmetric SROC**  
AUC = 0.9564  
SE(AUC) = 0.0276  
Q\* = 0.8993  
SE(Q\*) = 0.0390

**Asymmetric SROC**  
AUC = 0.9442  
SE(AUC) = 0.0461  
Q\* = 0.8993  
SE(Q\*) = 0.0390

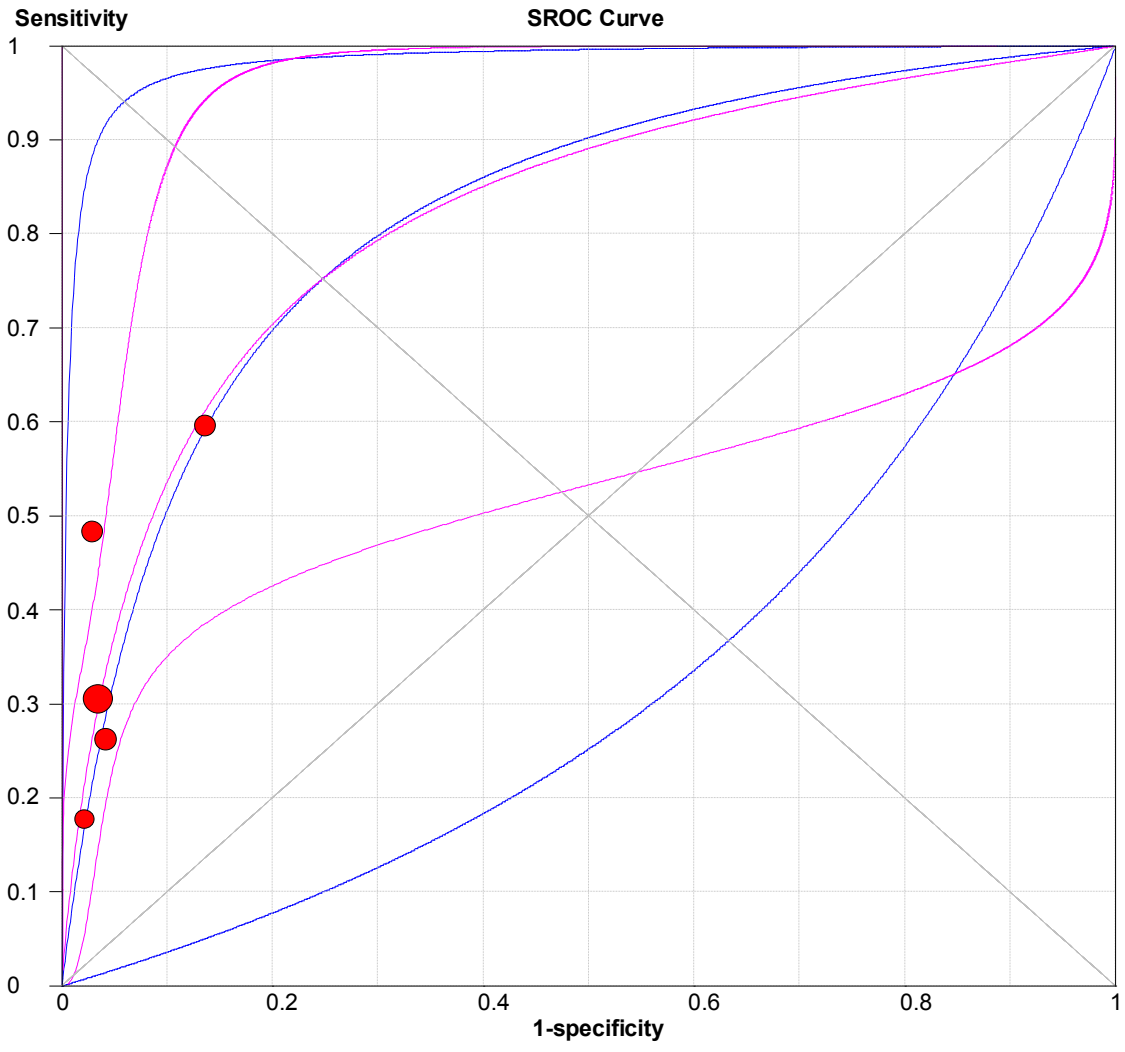

**Symmetric SROC**  
AUC = 0.8186  
SE(AUC) = 0.1081  
Q\* = 0.7524  
SE(Q\*) = 0.0969

**Asymmetric SROC**  
AUC = 0.8184  
SE(AUC) = 0.1086  
Q\* = 0.7524  
SE(Q\*) = 0.0969
