# Supplementary material for: Accuracy of clinical tests in the diagnosis of anterior cruciate ligament injury: a systematic review
Source: PubMed Central journal article supplement (PMC4152763; doi:10.1186/s12998-014-0025-8), 2014-08-01
Supplement: s12998-014-0025-8-S5.pdf [file s12998-014-0025-8-S5.pdf]

**Anterior Draw**

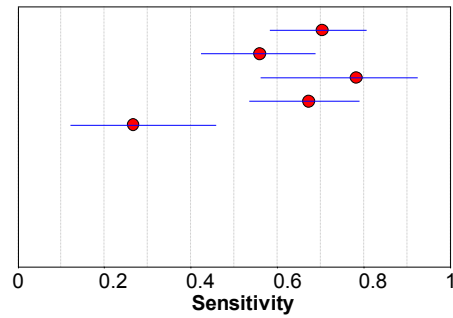

| Study         | Sensitivity (95% CI) |
|---------------|----------------------|
| Beldame. 2011 | 0.70 (0.58 - 0.81)   |
| Boeree. 1991  | 0.56 (0.42 - 0.69)   |
| Lee. 1988     | 0.78 (0.56 - 0.93)   |
| Richter. 1996 | 0.67 (0.54 - 0.79)   |
| Tonino. 1986  | 0.27 (0.12 - 0.46)   |

Pooled Sensitivity = 0.61 (0.55 to 0.68)  
 Chi-square = 22.00; df = 4 (p = 0.0002)  
 Inconsistency (I-square) = 81.8 %

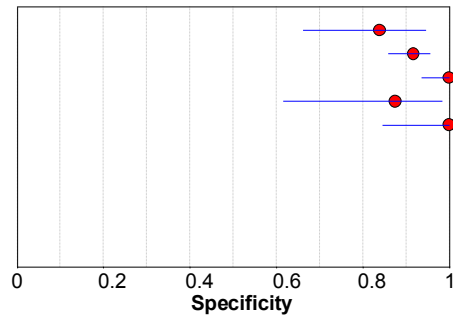

| Study         | Specificity (95% CI) |
|---------------|----------------------|
| Beldame. 2011 | 0.84 (0.66 - 0.95)   |
| Boeree. 1991  | 0.92 (0.86 - 0.96)   |
| Lee. 1988     | 1.00 (0.94 - 1.00)   |
| Richter. 1996 | 0.88 (0.62 - 0.98)   |
| Tonino. 1986  | 1.00 (0.85 - 1.00)   |

Pooled Specificity = 0.93 (0.89 to 0.96)  
 Chi-square = 15.28; df = 4 (p = 0.0042)  
 Inconsistency (I-square) = 73.8 %

**Lachman**

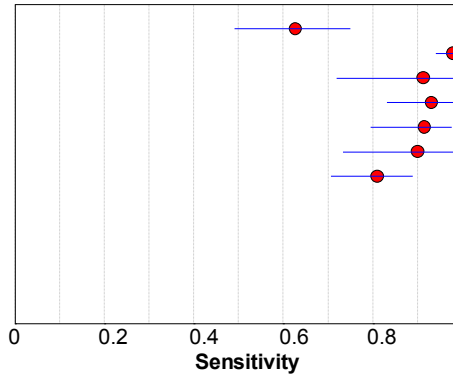

| Study            | Sensitivity (95% CI) |
|------------------|----------------------|
| Boeree. 1991     | 0.63 (0.49 - 0.75)   |
| Harilainen. 1987 | 0.98 (0.94 - 1.00)   |
| Lee. 1988        | 0.91 (0.72 - 0.99)   |
| Richter. 1996    | 0.93 (0.83 - 0.98)   |
| Schwarz. 1997    | 0.91 (0.80 - 0.98)   |
| Tonino. 1986     | 0.90 (0.73 - 0.98)   |
| Beldame. 2011    | 0.81 (0.71 - 0.89)   |

Pooled Sensitivity = 0.88 (0.85 to 0.91)  
 Chi-square = 50.66; df = 6 (p = 0.0000)  
 Inconsistency (I-square) = 88.2 %

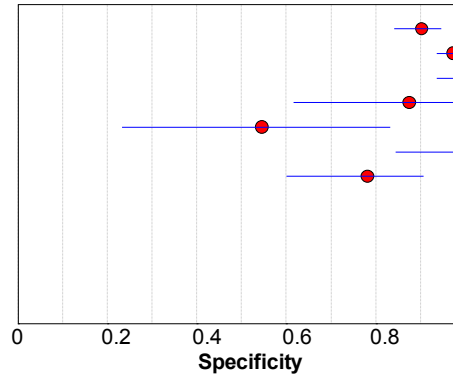

| Study            | Specificity (95% CI) |
|------------------|----------------------|
| Boeree. 1991     | 0.90 (0.84 - 0.95)   |
| Harilainen. 1987 | 0.97 (0.94 - 0.99)   |
| Lee. 1988        | 1.00 (0.94 - 1.00)   |
| Richter. 1996    | 0.88 (0.62 - 0.98)   |
| Schwarz. 1997    | 0.55 (0.23 - 0.83)   |
| Tonino. 1986     | 1.00 (0.85 - 1.00)   |
| Beldame. 2011    | 0.78 (0.60 - 0.91)   |

Pooled Specificity = 0.93 (0.90 to 0.95)  
 Chi-square = 39.41; df = 6 (p = 0.0000)  
 Inconsistency (I-square) = 84.8 %

**Pivot Shift**

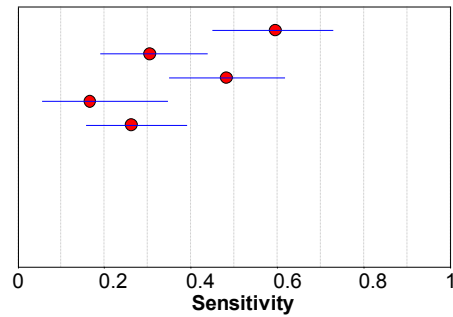

| Study         | Sensitivity (95% CI) |
|---------------|----------------------|
| Beldame. 2011 | 0.60 (0.45 - 0.73)   |
| Boeree. 1991  | 0.31 (0.19 - 0.44)   |
| Richter. 1996 | 0.48 (0.35 - 0.62)   |
| Tonino. 1986  | 0.17 (0.06 - 0.35)   |
| Noyes. 1980   | 0.26 (0.16 - 0.39)   |

Pooled Sensitivity = 0.38 (0.32 to 0.44)  
 Chi-square = 24.21; df = 4 (p = 0.0001)  
 Inconsistency (I-square) = 83.5 %

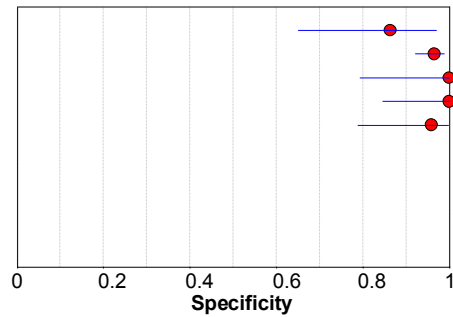

| Study         | Specificity (95% CI) |
|---------------|----------------------|
| Beldame. 2011 | 0.86 (0.65 - 0.97)   |
| Boeree. 1991  | 0.97 (0.92 - 0.99)   |
| Richter. 1996 | 1.00 (0.79 - 1.00)   |
| Tonino. 1986  | 1.00 (0.85 - 1.00)   |
| Noyes. 1980   | 0.96 (0.79 - 1.00)   |

Pooled Specificity = 0.96 (0.93 to 0.98)  
 Chi-square = 6.55; df = 4 (p = 0.1616)  
 Inconsistency (I-square) = 38.9 %
