# Supplementary material for: Accuracy of clinical tests in the diagnosis of anterior cruciate ligament injury: a systematic review
Source: PubMed Central journal article supplement (PMC4152763; doi:10.1186/s12998-014-0025-8), 2014-08-01

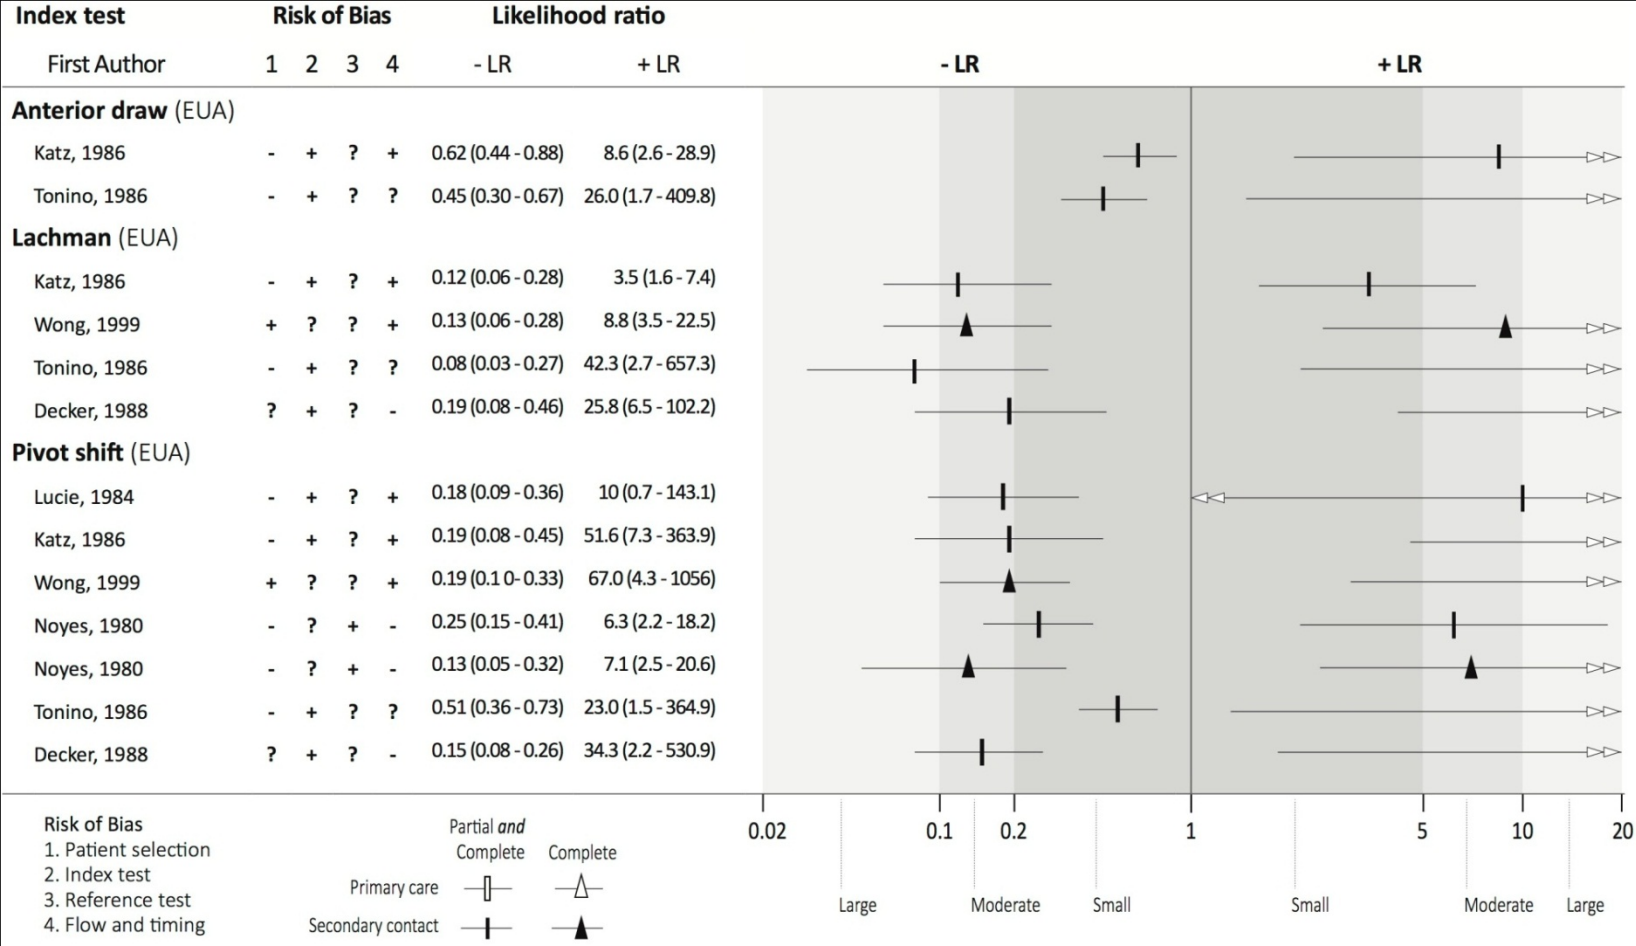

Supplement: s12998-014-0025-8-S6.pdf [file s12998-014-0025-8-S6.pdf]
